# Supplementary material
Source: HighWire-hosted journal article supplement (https://bmjopen.bmj.com/content/13/2/e067316)
Supplement: inline-supplementary-material-2 [file inline-supplementary-material-2.pdf]

## SUPPLEMENTAL MATERIAL

### Table of Contents

|                                                                                                                         |    |
|-------------------------------------------------------------------------------------------------------------------------|----|
| Table S1. Feeding initiation, exclusivity, difficulties, and counseling .....                                           | 2  |
| Table S2. Feeding profile by site and study visit .....                                                                 | 3  |
| Table S3. Feeding of prelacteal feeds, expressed human milk, and donor human milk in the first month of life.....       | 4  |
| Table S4. Type of human milk fed by mother by visit week .....                                                          | 5  |
| Table S5. Formula and animal milk feeding by visit week.....                                                            | 6  |
| Table S6. Feeding difficulties and lactation support/ feeding counseling .....                                          | 7  |
| Table S7. Feeding difficulties in the first six months and poor growth outcomes at six months .....                     | 8  |
| Table S8. Duration of exclusive breastfeeding and poor growth outcomes.....                                             | 9  |
| Table S9. Duration of exclusive breastfeeding to six months and poor growth outcomes at six months by birthweight ..... | 10 |

**Table S1.** Feeding initiation, exclusivity, difficulties, and counseling

|                                                                                    |                                     |                                     |                                   |                                  |                                  |
|------------------------------------------------------------------------------------|-------------------------------------|-------------------------------------|-----------------------------------|----------------------------------|----------------------------------|
| n (%) infants for whom breastfeeding was initiated within 1 hour of birth          | Preterm SGA<br>N=124<br>29 (23.4%)  | Preterm AGA<br>N=265<br>64 (24.2%)  | Preterm LGA<br>N=33<br>7 (21.2%)  | Term SGA<br>N=551<br>263 (47.7%) | Overall<br>N=973<br>363 (37.3%)  |
| n (%) infants exclusively breastfed to 4 months                                    | Preterm SGA<br>N=137<br>79 (57.7%)  | Preterm AGA<br>N=282<br>177 (62.8%) | Preterm LGA<br>N=32<br>25 (78.1%) | Term SGA<br>N=517<br>295 (57.1%) | Overall<br>N=968<br>576 (59.5%)  |
| n (%) infants exclusively breastfed to 6 months                                    | Preterm SGA<br>N=132<br>62 (47.0%)  | Preterm AGA<br>N=277<br>128 (46.2%) | Preterm LGA<br>N=31<br>13 (41.9%) | Term SGA<br>N=531<br>222 (41.8%) | Overall<br>N=971<br>425 (43.8%)  |
| n (%) infants who mothers reported feeding difficulties* during first 6 months     | Preterm SGA<br>N=151<br>81 (53.6%)  | Preterm AGA<br>N=327<br>153 (46.8%) | Preterm LGA<br>N=37<br>16 (43.2%) | Term SGA<br>N=597<br>243 (40.7%) | Overall<br>N=1112<br>493 (44.3%) |
| n (%) infants who mothers reported feeding difficulties* during first 2 weeks      | Preterm SGA<br>N=151<br>55 (36.4%)  | Preterm AGA<br>N=327<br>100 (30.6%) | Preterm LGA<br>N=37<br>11 (29.7%) | Term SGA<br>N=597<br>137 (22.9%) | Overall<br>N=1112<br>303 (27.2%) |
| n (%) infants who mothers reported feeding difficulties* during first 4 weeks      | Preterm SGA<br>N=129<br>59 (45.7%)  | Preterm AGA<br>N=283<br>109 (38.5%) | Preterm LGA<br>N=32<br>11 (34.4%) | Term SGA<br>N=509<br>155 (30.5%) | Overall<br>N=953<br>304 (31.9%)  |
| n (%) infants who mothers reported feeding difficulties* from 6 weeks tot 6 months | Preterm SGA<br>N=151<br>48 (31.8%)  | Preterm AGA<br>N=327<br>77 (23.5%)  | Preterm LGA<br>N=37<br>6 (16.2%)  | Term SGA<br>N=597<br>163 (27.3%) | Overall<br>N=1112<br>294 (26.4%) |
| n (%) infants who received feeding counseling/support at baseline†                 | Preterm SGA<br>N=151<br>118 (78.2%) | Preterm AGA<br>N=327<br>267 (81.7%) | Preterm LGA<br>N=37<br>27 (73.0%) | Term SGA<br>N=594<br>443 (74.6%) | Overall<br>N=1109<br>855 (77.1%) |

\*Feeding difficulties included perception of insufficient milk, distracted baby, long time for milk to come in, no milk let down, breast pain, trouble sucking/latching on, etc.

†Within 72 hours of birth.

**Table S2.** Feeding profile by site and study visit

|                                  | Baseline    | Week 1       | Week 2      | Week 4      | Week 6      | Week 10     | Week 14     | Week 18     | Week 26     |
|----------------------------------|-------------|--------------|-------------|-------------|-------------|-------------|-------------|-------------|-------------|
| <b>Pooled</b>                    | N=1114      | N=1049       | N=1039      | N=1033      | N=1025      | N=1008      | N=985       | N=969       | N=984       |
| Only human milk                  | 990 (88.9%) | 1021 (97.3%) | 998 (96.1%) | 986 (95.5%) | 961 (93.8%) | 892 (88.5%) | 826 (83.9%) | 697 (71.9%) | 75 (7.6%)   |
| Mixed milk feeding               | 26 (2.3%)   | 25 (2.4%)    | 36 (3.5%)   | 40 (3.9%)   | 56 (5.5%)   | 105 (10.4%) | 148 (15.0%) | 257 (26.5%) | 890 (90.4%) |
| No human milk                    | 4 (0.4%)    | 2 (0.2%)     | 5 (0.5%)    | 7 (0.7%)    | 8 (0.8%)    | 11 (1.1%)   | 11 (1.1%)   | 15 (1.5%)   | 19 (1.9%)   |
| No food given yet, baseline only | 94 (8.4%)   | 1 (0.1%)     | 0 (0%)      | 0 (0%)      | 0 (0%)      | 0 (0%)      | 0 (0%)      | 0 (0%)      | 0 (0%)      |
| <b>India-Karnataka</b>           | N=309       | N=300        | N=297       | N=295       | N=287       | N=286       | N=276       | N=274       | N=286       |
| Only human milk                  | 270 (87.4%) | 298 (99.3%)  | 288 (97.0%) | 278 (94.2%) | 265 (92.3%) | 248 (86.7%) | 228 (82.6%) | 192 (70.1%) | 19 (6.6%)   |
| Mixed milk feeding               | 8 (2.6%)    | 2 (0.7%)     | 9 (3.0%)    | 16 (5.4%)   | 22 (7.7%)   | 36 (12.6%)  | 46 (16.7%)  | 80 (29.2%)  | 264 (92.3%) |
| No human milk                    | 1 (0.3%)    | 0 (0%)       | 0 (0%)      | 1 (0.3%)    | 0 (0%)      | 2 (0.7%)    | 2 (0.7%)    | 2 (0.7%)    | 3 (1.0%)    |
| No food given yet, baseline only | 30 (9.7%)   | 0 (0%)       | 0 (0%)      | 0 (0%)      | 0 (0%)      | 0 (0%)      | 0 (0%)      | 0 (0%)      | 0 (0%)      |
| <b>India-Odisha</b>              | N=197       | N=184        | N=178       | N=176       | N=181       | N=172       | N=160       | N=148       | N=158       |
| Only human milk                  | 177 (89.8%) | 174 (94.6%)  | 168 (94.4%) | 167 (94.9%) | 167 (92.3%) | 140 (81.4%) | 118 (73.8%) | 103 (69.6%) | 5 (3.2%)    |
| Mixed milk feeding               | 15 (7.6%)   | 10 (5.4%)    | 9 (5.1%)    | 9 (5.1%)    | 13 (7.2%)   | 32 (18.6%)  | 40 (25.0%)  | 42 (28.4%)  | 146 (92.4%) |
| No human milk                    | 3 (1.5%)    | 0 (0%)       | 1 (0.6%)    | 0 (0%)      | 1 (0.6%)    | 0 (0%)      | 2 (1.2%)    | 3 (2.0%)    | 7 (4.4%)    |
| No food given yet, baseline only | 2 (1.0%)    | 0 (0%)       | 0 (0%)      | 0 (0%)      | 0 (0%)      | 0 (0%)      | 0 (0%)      | 0 (0%)      | 0 (0%)      |
| <b>Malawi</b>                    | N=300       | N=262        | N=263       | N=261       | N=258       | N=254       | N=252       | N=251       | N=245       |
| Only human milk                  | 292 (97.3%) | 258 (98.5%)  | 254 (96.6%) | 253 (96.9%) | 240 (93.0%) | 227 (89.4%) | 210 (83.3%) | 181 (72.1%) | 46 (18.8%)  |
| Mixed milk feeding               | 1 (0.3%)    | 4 (1.5%)     | 9 (3.4%)    | 7 (2.7%)    | 16 (6.2%)   | 25 (9.8%)   | 40 (15.9%)  | 68 (27.1%)  | 196 (80.0%) |
| No human milk                    | 0 (0%)      | 0 (0%)       | 0 (0%)      | 1 (0.4%)    | 2 (0.8%)    | 2 (0.8%)    | 2 (0.8%)    | 2 (0.8%)    | 3 (1.2%)    |
| No food given yet, baseline only | 7 (2.3%)    | 0 (0%)       | 0 (0%)      | 0 (0%)      | 0 (0%)      | 0 (0%)      | 0 (0%)      | 0 (0%)      | 0 (0%)      |
| <b>Tanzania</b>                  | N=308       | N=303        | N=301       | N=301       | N=299       | N=296       | N=297       | N=296       | N=295       |
| Only human milk                  | 251 (81.5%) | 291 (96.0%)  | 288 (95.7%) | 288 (95.7%) | 289 (96.7%) | 277 (93.6%) | 270 (90.9%) | 221 (74.7%) | 5 (1.7%)    |
| Mixed milk feeding               | 2 (0.7%)    | 9 (3.0%)     | 9 (3.0%)    | 8 (2.7%)    | 5 (1.7%)    | 12 (4.1%)   | 22 (7.4%)   | 67 (22.6%)  | 284 (96.3%) |
| No human milk                    | 0 (0%)      | 2 (0.7%)     | 4 (1.3%)    | 5 (1.7%)    | 5 (1.7%)    | 7 (2.4%)    | 5 (1.7%)    | 8 (2.7%)    | 6 (2.0%)    |
| No food given yet, baseline only | 55 (17.9%)  | 1 (0.3%)     | 0 (0%)      | 0 (0%)      | 0 (0%)      | 0 (0%)      | 0 (0%)      | 0 (0%)      | 0 (0%)      |

**Table S3.** Feeding of prelacteal feeds, expressed human milk, and donor human milk in the first month of life

|                                         |                              | Baseline     | Week 1      | Week 2      | Week 4      |
|-----------------------------------------|------------------------------|--------------|-------------|-------------|-------------|
| <b>Prelacteal Feeds</b>                 |                              | N=1114       | N=1049      | N=1039      | N=1033      |
| Infants fed prelacteal feeds, n (%)*    |                              | 4 (0.4%)     | 1 (0.1%)    | 0 (0%)      | 0 (0%)      |
| <b>Human milk expression</b>            |                              | N=1017       | N=1041      | N=1032      | N=1025      |
| Infants fed expressed human milk, n (%) |                              | 264 (26.0%)  | 313 (30.1%) | 246 (23.8%) | 182 (17.8%) |
| Method of feeding used, n (%)           | Cup/spoon/palladai           | 253 (98.5%)  | 292 (93.3%) | 239 (97.2%) | 179 (98.4%) |
|                                         | Bottle                       | 1 (0.4%)     | 4 (1.3%)    | 1 (0.4%)    | 2 (1.1%)    |
|                                         | Nasogastric tube             | 5 (1.9%)     | 9 (2.9%)    | 1 (0.4%)    | 0 (0%)      |
|                                         | Syringe                      | 1 (0.4%)     | 1 (0.3%)    | 0 (0%)      | 0 (0%)      |
|                                         | Other                        | 2 (0.8%)     | 6 (1.9%)    | 1 (0.4%)    | 2 (1.1%)    |
| Method of expression, n (%)             | Electric breast pump         | 0 (0%)       | 16 (5.1%)   | 1 (0.4%)    | 0 (0%)      |
|                                         | Battery-operated breast pump | 0 (0%)       | 0 (0%)      | 0 (0%)      | 0 (0%)      |
|                                         | Manual breast pump           | 0 (0%)       | 7 (2.2%)    | 1 (0.4%)    | 2 (1.1%)    |
|                                         | By hand (no pump)            | 0 (0%)       | 290 (92.7%) | 240 (97.6%) | 180 (98.9%) |
|                                         | Not known                    | 264 (100.0%) | 3 (1.0%)    | 3 (1.2%)    | 0 (0%)      |
| <b>Donor human milk (DHM)</b>           |                              | N=1017       | N=1042      | N=1033      | N=1025      |
| Infants fed DHM, n (%)                  |                              | 14 (1.4%)    | 5 (0.5%)    | 3 (0.3%)    | 0 (0%)      |
| Method of feeding used, n (%)           | Cup/spoon/palladai           | 13 (92.9%)   | 4 (80.0%)   | 3 (100.0%)  | 0 (0%)      |
|                                         | Bottle                       | 0 (0%)       | 0 (0%)      | 0 (0%)      | 0 (0%)      |
|                                         | Nasogastric tube             | 0 (0%)       | 0 (0%)      | 0 (0%)      | 0 (0%)      |
|                                         | Syringe                      | 1 (7.1%)     | 0 (0%)      | 0 (0%)      | 0 (0%)      |
|                                         | Other                        | 0 (0%)       | 1 (20.0%)   | 0 (0%)      | 0 (0%)      |

\*All prelacteal feeds were formula.

Methods of feeding expressed or donor human milk (cup/spoon/palladia, bottle, nasogastric tube, syringe and other) are not mutually exclusive.

**Table S4.** Type of human milk fed by mother by visit week

| Type of human milk                      | Baseline<br>(N=1008) | Week 1<br>(N=1044) | Week 2<br>(N=1032) | Week 4<br>(N=1026) | Week 6<br>(N=1016) | Week 10<br>(N=996) | Week 14<br>(N=974) | Week 18<br>(N=954) | Week 26<br>(N=965) |
|-----------------------------------------|----------------------|--------------------|--------------------|--------------------|--------------------|--------------------|--------------------|--------------------|--------------------|
| Direct from breast only, n (%)          | 744 (73.8%)          | 731 (70.0%)        | 786 (76.2%)        | 844 (82.3%)        | 931 (91.6%)        | 964 (96.8%)        | 961 (98.7%)        | 946 (99.2%)        | 962 (99.7%)        |
| Expressed only, n (%)                   | 23 (2.3%)            | 33 (3.2%)          | 24 (2.3%)          | 9 (0.9%)           | 2 (0.2%)           | 1 (0.1%)           | 1 (0.1%)           | 1 (0.1%)           | 0 (0%)             |
| Direct from breast and expressed, n (%) | 241 (23.9%)          | 280 (26.8%)        | 222 (21.5%)        | 173 (16.9%)        | 83 (8.2%)          | 31 (3.1%)          | 12 (1.2%)          | 7 (0.7%)           | 3 (0.3%)           |

**Table S5.** Formula and animal milk feeding by visit week

|                                | Baseline           | Week 1      | Week 2     | Week 4     | Week 6     | Week 10    | Week 14    | Week 18    | Week 26     |             |
|--------------------------------|--------------------|-------------|------------|------------|------------|------------|------------|------------|-------------|-------------|
| <b>Formula</b>                 | N=1070             | N=1044      | N=1040     | N=1032     | N=1024     | (N=1006)   | N=981      | N=969      | N=983       |             |
| Infants fed formula, n (%)     | 20 (1.9%)          | 22 (2.1%)   | 30 (2.9%)  | 28 (2.7%)  | 36 (3.5%)  | 59 (5.9%)  | 61 (6.2%)  | 87 (9.0%)  | 143 (14.6%) |             |
| Method of feeding used, n (%)  | Cup/spoon/palladai | 18 (90.0%)  | 13 (59.1%) | 17 (56.7%) | 11 (39.3%) | 14 (38.9%) | 21 (35.6%) | 19 (31.2%) | 34 (39.1%)  | 84 (58.7%)  |
|                                | Bottle             | 2 (10.0%)   | 9 (40.9%)  | 13 (43.3%) | 17 (60.7%) | 24 (66.7%) | 38 (64.4%) | 43 (70.5%) | 55 (63.2%)  | 58 (40.6%)  |
|                                | Other              | 0 (0%)      | 0 (0%)     | 0 (0%)     | 0 (0%)     | 0 (0%)     | 0 (0%)     | 0 (0%)     | 0 (0%)      | 1 (0.7%)    |
| Type of formula fed, n (%)     | Preterm            | 0 (0%)      | 5 (22.7%)  | 8 (26.7%)  | 4 (14.3%)  | 3 (8.3%)   | 2 (3.4%)   | 8 (13.1%)  | 7 (8.1%)    | 1 (0.7%)    |
|                                | Term               | 0 (0%)      | 5 (22.7%)  | 6 (20.0%)  | 9 (32.1%)  | 21 (58.3%) | 32 (54.2%) | 31 (50.8%) | 57 (65.5%)  | 106 (74.1%) |
|                                | Powdered           | 0 (0%)      | 8 (36.4%)  | 12 (40.0%) | 5 (17.9%)  | 17 (19.4%) | 18 (30.5%) | 28 (45.9%) | 24 (27.6%)  | 22 (15.4%)  |
|                                | Ready-made         | 0 (0%)      | 0 (0%)     | 0 (0%)     | 0 (0%)     | 2 (5.6%)   | 0 (0%)     | 0 (0%)     | 0 (0%)      | 3 (2.1%)    |
|                                | Not known          | 20 (100.0%) | 0 (0%)     | 0 (0%)     | 0 (0%)     | 0 (0%)     | 0 (0%)     | 0 (0%)     | 0 (0%)      | 1 (0.7%)    |
| <b>Animal milk</b>             | N=1073             | N=1041      | N=1033     | N=1028     | N=1020     | N=1003     | N=978      | N=968      | N=983       |             |
| Infants fed animal milk, n (%) | 2 (0.2%)           | 5 (0.5%)    | 16 (1.6%)  | 17 (1.7%)  | 18 (1.8%)  | 38 (3.8%)  | 34 (3.5%)  | 50 (5.2%)  | 138 (14.0%) |             |

Methods of feeding formula and types of formula are not mutually exclusive, respectively.

**Table S6.** Feeding difficulties and lactation support/ feeding counseling

|                                                                                         |                                              | <b>India-Karnataka</b> | <b>India-Odisha</b> | <b>Malawi</b> | <b>Tanzania</b> | <b>Pooled</b> |
|-----------------------------------------------------------------------------------------|----------------------------------------------|------------------------|---------------------|---------------|-----------------|---------------|
| n (%) infants who mothers reported feeding difficulties during first 6 months           |                                              | <b>N=309</b>           | <b>N=197</b>        | <b>N=300</b>  | <b>N=308</b>    | <b>N=1114</b> |
|                                                                                         | Overall                                      | 138 (44.7%)            | 42 (21.3%)          | 139 (46.3%)   | 176 (57.1%)     | 495 (44.4%)   |
|                                                                                         | Preterm SGA                                  | 21 (50.0%)             | 9 (60.0%)           | 16 (42.1%)    | 35 (62.5%)      | 81 (53.6%)    |
|                                                                                         | Preterm AGA                                  | 27 (43.6%)             | 7 (25.0%)           | 46 (43.0%)    | 73 (56.2%)      | 153 (46.8%)   |
|                                                                                         | Preterm LGA                                  | 1 (50.0%)              | 0 (0%)              | 5 (31.3%)     | 10 (55.6%)      | 16 (43.2%)    |
|                                                                                         | Term SGA                                     | 89 (43.8%)             | 26 (17.0%)          | 71 (51.5%)    | 57 (55.3%)      | 243 (40.7%)   |
| n (%) infants who received lactation support/ feeding counseling at baseline*           |                                              | <b>N=308</b>           | <b>N=197</b>        | <b>N=298</b>  | <b>N=308</b>    | <b>N=1111</b> |
|                                                                                         | Overall                                      | 245 (79.6%)            | 109 (55.3%)         | 258 (86.6%)   | 254 (79.6%)     | 857 (77.1%)   |
|                                                                                         | Preterm SGA                                  | 33 (78.6%)             | 7 (46.7%)           | 34 (89.5%)    | 44 (78.6%)      | 118 (78.2%)   |
|                                                                                         | Preterm AGA                                  | 44 (71.0%)             | 13 (46.4%)          | 98 (91.6%)    | 112 (86.2%)     | 267 (81.7%)   |
|                                                                                         | Preterm LGA                                  | 2 (100%)               | 1 (100%)            | 13 (81.3%)    | 11 (61.1%)      | 27 (73.0%)    |
|                                                                                         | Term SGA                                     | 166 (82.2%)            | 88 (57.5%)          | 112 (82.4%)   | 77 (74.8%)      | 443 (74.6%)   |
| Among those who received support at baseline, n (%) infants by type of support received |                                              | <b>N=245</b>           | <b>N=109</b>        | <b>N=258</b>  | <b>N=254</b>    | <b>N=857</b>  |
|                                                                                         | Talking about proper latch and positioning   | 228 (93.1%)            | 108 (99.1%)         | 174 (67.4%)   | 243 (99.2%)     | 753 (87.9%)   |
|                                                                                         | Support with positioning mom/baby            | 183 (74.7%)            | 31 (28.4%)          | 102 (39.5%)   | 240 (98.0%)     | 556 (64.9%)   |
|                                                                                         | Support with latching                        | 86 (35.1%)             | 7 (6.4%)            | 109 (42.2%)   | 194 (79.2%)     | 396 (46.2%)   |
|                                                                                         | Support with expressing breastmilk           | 30 (12.2%)             | 0 (0%)              | 158 (61.2%)   | 179 (73.1%)     | 367 (42.8%)   |
|                                                                                         | Support for feeding with bottle/cup/palladai | 8 (3.3%)               | 1 (0.9%)            | 104 (40.3%)   | 158 (64.5%)     | 271 (31.6%)   |
|                                                                                         | Other                                        | 1 (0.4%)               | 0 (0%)              | 51 (19.8%)    | 0 (0%)          | 52 (6.1%)     |
| Among those who received support at baseline, n (%) infants by who provided support     |                                              | <b>N=245</b>           | <b>N=109</b>        | <b>N=258</b>  | <b>N=254</b>    | <b>N=857</b>  |
|                                                                                         | Healthcare provider (doctor, nurse, midwife) | 242 (98.8%)            | 67 (61.5%)          | 252 (97.7%)   | 245 (100%)      | 806 (94.1%)   |
|                                                                                         | Lactation consultant                         | 11 (4.5%)              | 0 (0%)              | 4 (1.6%)      | 6 (2.5%)        | 21 (2.5%)     |
|                                                                                         | Community health workers                     | 7 (2.9%)               | 13 (11.9%)          | 2 (0.8%)      | 0 (0%)          | 22 (2.6%)     |
|                                                                                         | Family member                                | 61 (24.9%)             | 44 (40.4%)          | 41 (15.9%)    | 1 (0.4%)        | 147 (17.2%)   |
|                                                                                         | Friend                                       | 0 (0%)                 | 0 (0%)              | 15 (5.8%)     | 0 (0%)          | 15 (1.8%)     |
|                                                                                         | Other                                        | 1 (0.4%)               | 0 (0%)              | 0 (0%)        | 0 (0%)          | 1 (0.1%)      |

\*Within 72 hours of birth.

**Table S7.** Feeding difficulties in the first six months and poor growth outcomes at six months

|                         | n (%) of poor growth outcomes among infants whose mothers ever reported feeding difficulties in first 6 months of the infant's life | Unadjusted |                  |         | Adjusted* |                  |         |
|-------------------------|-------------------------------------------------------------------------------------------------------------------------------------|------------|------------------|---------|-----------|------------------|---------|
|                         |                                                                                                                                     | N          | RR (95% CI)      | p-value | N         | RR (95% CI)      | p-value |
| Stunted at 6 months     | 153 (37.1%)                                                                                                                         | 858        | 1.21 (0.99-1.48) | 0.063   | 833       | 1.13 (0.92-1.39) | 0.227   |
| Underweight at 6 months | 127 (30.6%)                                                                                                                         | 860        | 1.55 (1.22-1.98) | <0.001  | 835       | 1.39 (1.09-1.78) | 0.01    |
| Wasted at 6 months      | 46 (11.1%)                                                                                                                          | 859        | 1.49 (1.00-2.21) | 0.05    | 834       | 1.36 (0.91-2.03) | 0.134   |

\*Adjusted by maternal education, maternal age, parity, place of residence, wealth quintile, birthcount, sex, LBW type, site; and with cluster-robust standard errors for clustering by mother.



**Table S8.** Duration of exclusive breastfeeding and poor growth outcomes

|                         | Exclusive breastfeeding to 6 months or duration of exclusive breastfeeding (in weeks) |                                       |              |                    |                   |           |                    |                    |
|-------------------------|---------------------------------------------------------------------------------------|---------------------------------------|--------------|--------------------|-------------------|-----------|--------------------|--------------------|
|                         | n (%) of poor growth outcomes among infants                                           |                                       | Unadjusted   |                    |                   | Adjusted* |                    |                    |
|                         | Exclusively breastfed to 6 months                                                     | Non-exclusively breastfed to 6 months | N            | RR/Beta (95% CI)   | p-value           | N         | RR/Beta (95% CI)   | p-value            |
| Stunted at 6 months     | 116 (32.0%)                                                                           | 158 (32.9%)                           | 847          | 1.00 (0.81-1.24)   | 0.97              | 821       | 1.08 (0.88-1.31)   | 0.47               |
| Underweight at 6 months | 91 (25.1%)                                                                            | 127 (26.3%)                           | 849          | 0.98 (0.77-1.26)   | 0.90              | 823       | 1.08 (0.86-1.36)   | 0.51               |
| Wasted at 6 months      | 40 (11.0%)                                                                            | 45 (9.3%)                             | 848          | 1.15 (0.77-1.73)   | 0.50              | 822       | 1.30 (0.86-1.95)   | 0.22               |
|                         | Mean (SD) z-score among infants                                                       |                                       | Unadjusted   |                    |                   | Adjusted* |                    |                    |
|                         | Exclusively breastfed to 6 months                                                     | Not exclusively breastfed to 6 months | N            | Beta (95% CI)      | p-value           | N         | Beta (95% CI)      | p-value            |
|                         | LAZ at 6 months                                                                       | -1.38 (1.32)                          | -1.45 (1.23) | 847                | 0.04 (-0.14-0.22) | 0.67      | 821                | -0.03 (-0.19-0.14) |
| WAZ at 6 months         | -1.20 (1.24)                                                                          | -1.26 (1.18)                          | 849          | 0.03 (-0.15-0.20)  | 0.76              | 823       | -0.07 (-0.23-0.09) | 0.37               |
| WLZ at 6 months         | -0.33 (1.31)                                                                          | -0.32 (1.32)                          | 848          | -0.04 (-0.22-0.14) | 0.69              | 822       | -0.09 (-0.27-0.09) | 0.31               |

\*Adjusted for maternal education, maternal age, parity, wealth quintile, residence, infant sex, birthcount, and LBW type; and with cluster-robust standard errors for clustering by mother.

**Table S9.** Duration of exclusive breastfeeding to six months and poor growth outcomes at six months by birthweight

| Strata of birthweight           | Stunted at 6 months                                         |                                                                | Underweight at 6 months                                     |                                                                | Wasted at 6 months                                          |                                                                |
|---------------------------------|-------------------------------------------------------------|----------------------------------------------------------------|-------------------------------------------------------------|----------------------------------------------------------------|-------------------------------------------------------------|----------------------------------------------------------------|
|                                 | Crude RR (95% CI) EBF 6 months compared to non-EBF 6 months | Adjusted RR (95% CI) EBF 6 months compared to non-EBF 6 months | Crude RR (95% CI) EBF 6 months compared to non-EBF 6 months | Adjusted RR (95% CI) EBF 6 months compared to non-EBF 6 months | Crude RR (95% CI) EBF 6 months compared to non-EBF 6 months | Adjusted RR (95% CI) EBF 6 months compared to non-EBF 6 months |
| Birthweight <2.00kg             | 1.10 (0.82-1.47)                                            | 0.84 (0.57-1.25)                                               | 1.00 (0.42-2.38)                                            | 1.22 (0.90-1.66)                                               | 0.93 (0.63-1.36)                                            | 1.06 (0.44-2.59)                                               |
| Birthweight ≥2.00 - <2.50kg     | 0.94 (0.72-1.23)                                            | 1.05 (0.78-1.43)                                               | 1.20 (0.76-1.89)                                            | 0.97 (0.76-1.25)                                               | 1.14 (0.86-1.51)                                            | 1.37 (0.87-2.16)                                               |
| p-value for effect modification | 0.43                                                        | 0.37                                                           | 0.72                                                        | 0.24                                                           | 0.39                                                        | 0.62                                                           |

EBF: exclusive breastfeeding.
